# Supplementary material
Source: PubMed Central journal article supplement (PMC5971553)
Supplement: JCM.00105-18_zjm999095965s1.pdf [file JCM.00105-18_zjm999095965s1.pdf]

Table S1. Main and Alternate Primers Used for Nested PCR Amplification of PR/RT and IN

| <b>Gene</b> | <b>Primer Name</b> | <b>Primer</b>                   | <b>Direction</b> | <b>HXB2 Numbering</b> |
|-------------|--------------------|---------------------------------|------------------|-----------------------|
| PR/RT       | MAW-26             | TTGGAAATGTGGAAAGGAAGGAC         | Sense            | 2028→2050             |
|             | RT21               | CTGTATTTCTGCTATTAAGTCTTTTGATGGG | Antisense        | 3509←3539             |
|             | PRO-1              | CAGAGCCAACAGCCCCACCA            | Sense            | 2147→2166             |
|             | RT20               | CTGCCAGTTCTAGCTCTGCTTC          | Antisense        | 3441←3462             |
|             | ProF1              | CCTCAAATCATCCTTTGGCARCG         | Sense            | 2253→2275             |
|             | RTR1               | ATCCCTGCATAAATCTGACTTGC         | Antisense        | 3348←3370             |
|             | ProF2              | CTTTGGCAACGACCCCTYGTCWCA        | Sense            | 2265→2288             |
|             | RTR2               | CTTCTGTATGTCATTGACAGTCC         | Antisense        | 3304←3326             |
| IN          | IN12               | GCAGGATTCGGGATTAGAAG            | Sense            | 4007→4026             |
|             | IN13               | CTTTCTCCTGTATGCAGACC            | Antisense        | 5251←5270             |
|             | IN1                | AAGGTCTATCTGGCATGGGTA           | Sense            | 4137→4157             |
|             | BH4                | TCCCCTAGTGGGATGTGTACTTC         | Antisense        | 5200←5222             |
|             | INFORI             | GGAATCATTCAAGCACAACCAGA         | Sense            | 4059→4081             |
|             | INREV-I            | TCTCCTGTATGCAGACCCCAATAT        | Antisense        | 5244←5267             |
|             | HIV+4141           | TCTACCTGGCATGGGTACCA            | Sense            | 4141→4160             |
|             | INREVII            | CCTAGTGGGATGTGTACTTCTGA         | Antisense        | 5197←5219             |

Table S2. List of nucleoside RT inhibitor (NRTI), non-nucleoside RT inhibitor (NNRTI), protease inhibitor (PI), and integrase (IN) strand transfer inhibitor (INSTI) drug-resistance mutations (DRMs) detected by Sanger genotypic resistance testing in 138 PR/RT and 39 IN sequences with corresponding penalty scores

| NRTI DRM | #  | %    | % HIVDB | 3TC | ABC | AZT | TDF | NNRTI DRM | #  | %    | % HIVDB | EFV | ETR | RPV |
|----------|----|------|---------|-----|-----|-----|-----|-----------|----|------|---------|-----|-----|-----|
| M184V    | 67 | 48.6 | 53.6    | 60  | 15  | -10 | -10 | K103N     | 46 | 33.3 | 29.5    | 60  | 0   | 0   |
| M41L     | 52 | 37.7 | 27.3    | 0   | 5   | 15  | 5   | Y181C     | 28 | 20.3 | 16.9    | 30  | 30  | 45  |
| D67N     | 41 | 29.7 | 26      | 0   | 5   | 15  | 5   | K101E     | 17 | 12.3 | 6.9     | 15  | 15  | 45  |
| T215Y    | 38 | 27.5 | 24.6    | 0   | 10  | 40  | 10  | G190A     | 14 | 10.1 | 13.5    | 45  | 10  | 15  |
| L210W    | 31 | 22.5 | 16.6    | 0   | 5   | 15  | 5   | V108I     | 14 | 10.1 | 7.7     | 10  | 0   | 0   |
| K70R     | 29 | 21   | 17.6    | 0   | 5   | 30  | 5   | P225H     | 12 | 8.7  | 4.2     | 45  | 0   | 0   |
| K219Q    | 27 | 19.6 | 10.5    | 0   | 5   | 10  | 5   | H221Y     | 11 | 8    | 6.7     | 10  | 10  | 15  |
| L74V     | 20 | 14.5 | 7.5     | 0   | 30  | 0   | 0   | L100I     | 9  | 6.5  | 3.4     | 60  | 30  | 60  |
| K65R     | 19 | 13.8 | 6       | 30  | 45  | -15 | 60  | A98G      | 8  | 5.8  | 6.4     | 15  | 10  | 15  |
| T215F    | 19 | 13.8 | 9.1     | 0   | 10  | 40  | 10  | K101P     | 7  | 5.1  | 1.1     | 60  | 60  | 60  |
| K219E    | 10 | 7.2  | 5.8     | 0   | 5   | 10  | 5   | K238T     | 6  | 4.3  | 1.9     | 30  | 0   | 0   |
| L74I     | 10 | 7.2  | 3.7     | 0   | 30  | 0   | 5   | Y188L     | 6  | 4.3  | 3.7     | 60  | 10  | 60  |
| E44D     | 10 | 7.2  | 7.2     | 0   | 0   | 0   | 0   | Y181I     | 4  | 2.9  | 0.7     | 30  | 60  | 60  |
| T69D     | 9  | 6.5  | 5.4     | 0   | 0   | 0   | 0   | E138A     | 4  | 2.9  | 3.3     | 0   | 10  | 15  |
| D67G     | 8  | 5.8  | 2.3     | 0   | 5   | 10  | 5   | G190S     | 4  | 2.9  | 2       | 60  | 10  | 15  |
| T69ins   | 7  | 5.1  | 0.7     | 0   | 0   | 0   | 0   | Y188F     | 3  | 2.2  | 0.1     | 60  | 0   | 30  |
| A62V     | 7  | 5.1  | 4.5     | 5   | 5   | 5   | 5   | V179F     | 3  | 2.2  | 0.2     | 10  | 15  | 15  |
| T215D    | 5  | 3.6  | 0.5     | 0   | 5   | 20  | 5   | K101H     | 2  | 1.4  | 0.9     | 10  | 10  | 10  |
| K219R    | 4  | 2.9  | 2.4     | 0   | 5   | 10  | 5   | Y188C     | 2  | 1.4  | 0.6     | 60  | 0   | 0   |
| M184I    | 4  | 2.9  | 2       | 60  | 15  | -10 | -10 | E138K     | 2  | 1.4  | 0.5     | 10  | 10  | 45  |
| K219N    | 4  | 2.9  | 2.6     | 0   | 5   | 10  | 5   | G190E     | 2  | 1.4  | 0.4     | 60  | 45  | 60  |
| Y115F    | 3  | 2.2  | 3       | 0   | 60  | 0   | 15  | K238N     | 2  | 1.4  | 0.3     | 10  | 0   | 0   |
| V75M     | 3  | 2.2  | 3.2     | 0   | 0   | 10  | 0   | F227L     | 2  | 1.4  | 2.7     | 15  | 0   | 0   |
| E44A     | 3  | 2.2  | 1.3     | 0   | 0   | 0   | 0   | K103S     | 2  | 1.4  | 1.1     | 45  | 0   | 0   |
| K70G     | 3  | 2.2  | 0.3     | 10  | 15  | -10 | 15  | M230L     | 2  | 1.4  | 1.7     | 45  | 30  | 60  |
| K70E     | 3  | 2.2  | 1       | 10  | 15  | -10 | 15  | Y181F     | 1  | 0.7  | 0       | 15  | 15  | 30  |
| T215E    | 3  | 2.2  | 0.1     | 0   | 5   | 20  | 5   | Y188H     | 1  | 0.7  | 0.3     | 30  | 0   | 0   |
| K70Q     | 2  | 1.4  | 0.3     | 10  | 15  | 0   | 15  | V179L     | 1  | 0.7  | 0.1     | 10  | 10  | 15  |
| E40F     | 2  | 1.4  | 0.5     | 0   | 0   | 0   | 0   | E138Q     | 1  | 0.7  | 1.1     | 10  | 10  | 15  |
| V75I     | 2  | 1.4  | 2.8     | 5   | 5   | 5   | 5   | V106A     | 1  | 0.7  | 1.2     | 45  | 0   | 0   |
| F77L     | 2  | 1.4  | 1.7     | 5   | 5   | 10  | 5   | V179E     | 1  | 0.7  | 1.1     | 10  | 10  | 10  |
| D67H     | 2  | 1.4  | 0.2     | 0   | 5   | 10  | 5   | L100V     | 1  | 0.7  | 0.1     | 30  | 10  | 15  |
| T215L    | 1  | 0.7  | 0.1     | 0   | 5   | 20  | 5   | V106M     | 1  | 0.7  | 5.1     | 60  | 0   | 0   |
| D67E     | 1  | 0.7  | 0.4     | 0   | 5   | 10  | 5   | V179D     | 1  | 0.7  | 2.4     | 10  | 10  | 10  |
| T215I    | 1  | 0.7  | 1.3     | 0   | 5   | 20  | 5   |           |    |      |         |     |     |     |
| Q151M    | 1  | 0.7  | 2.6     | 15  | 60  | 60  | 15  |           |    |      |         |     |     |     |
| F116Y    | 1  | 0.7  | 2.1     | 5   | 10  | 10  | 5   |           |    |      |         |     |     |     |
| T215A    | 1  | 0.7  | 0.1     | 0   | 5   | 20  | 5   |           |    |      |         |     |     |     |
| V75T     | 1  | 0.7  | 1.1     | 0   | 0   | 0   | 0   |           |    |      |         |     |     |     |
| T215C    | 1  | 0.7  | 0.5     | 0   | 5   | 20  | 5   |           |    |      |         |     |     |     |

| PI DRM | #  | %    | %<br>HIVDB | ATV/r | DRV/r | LPV/r | INSTI<br>DRM | #  | %    | %<br>HIVDB | DTG | EVG | RAL |
|--------|----|------|------------|-------|-------|-------|--------------|----|------|------------|-----|-----|-----|
| L90M   | 27 | 19.6 | 25.8       | 25    | 0     | 15    | N155H        | 11 | 28.2 | 29.9       | 10  | 60  | 60  |
| M46I   | 19 | 13.8 | 19.7       | 10    | 0     | 10    | G140S        | 5  | 12.8 | 24.6       | 10  | 30  | 30  |
| V82A   | 17 | 12.3 | 20.5       | 15    | 0     | 30    | T97A         | 5  | 12.8 | 12.2       | 0   | 10  | 10  |
| L10F   | 14 | 10.1 | 7.6        | 0     | 5     | 5     | E92Q         | 5  | 12.8 | 6          | 10  | 60  | 30  |
| I54V   | 14 | 10.1 | 21.8       | 15    | 0     | 15    | Q148R        | 5  | 12.8 | 7.1        | 25  | 60  | 60  |
| L33F   | 11 | 8    | 11.5       | 5     | 5     | 5     | Q148H        | 4  | 10.3 | 22         | 25  | 60  | 60  |
| K43T   | 10 | 7.2  | 0.1        | 0     | 0     | 0     | E138K        | 4  | 10.3 | 0.5        | 10  | 15  | 15  |
| I84V   | 9  | 6.5  | 1          | 60    | 15    | 30    | G163K        | 3  | 7.7  | 1.7        | 0   | 15  | 15  |
| N88D   | 9  | 6.5  | 4.9        | 10    | 0     | 0     | G163R        | 2  | 5.1  | 7          | 0   | 15  | 15  |
| D30N   | 8  | 5.8  | 5.3        | 0     | 0     | 0     | G140A        | 2  | 5.1  | 1.7        | 10  | 30  | 30  |
| V32I   | 6  | 4.3  | 4.6        | 15    | 15    | 15    | E138A        | 2  | 5.1  | 3.3        | 10  | 15  | 15  |
| I47V   | 6  | 4.3  | 0          | 10    | 10    | 15    | E157Q        | 2  | 5.1  | 7.4        | 0   | 10  | 10  |
| G73S   | 5  | 3.6  | 6.6        | 10    | 0     | 5     | Y143R        | 2  | 5.1  | 6.6        | 5   | 10  | 60  |
| L23I   | 5  | 3.6  | 1.3        | 0     | 0     | 0     | Y143C        | 2  | 5.1  | 3.9        | 5   | 10  | 60  |
| M46L   | 5  | 3.6  | 8          | 10    | 0     | 10    | S147G        | 2  | 5.1  | 1.5        | 0   | 60  | 0   |
| L89V   | 4  | 2.9  | 3.2        | 0     | 5     | 0     | T66I         | 1  | 2.6  | 1.2        | 0   | 60  | 15  |
| V82T   | 4  | 2.9  | 2.1        | 30    | 0     | 30    | L74M         | 1  | 2.6  | 0          | 0   | 0   | 0   |
| G48V   | 3  | 2.2  | 2.8        | 30    | 0     | 10    | S230R        | 1  | 2.6  | 3.5        | 0   | 15  | 15  |
| V11I   | 3  | 2.2  | 2.7        | 0     | 0     | 0     | L74I         | 1  | 2.6  | 3.7        | 0   | 0   | 0   |
| F53L   | 3  | 2.2  | 5.6        | 10    | 0     | 0     | Q95K         | 1  | 2.6  | 1.4        | 0   | 10  | 10  |
| I54M   | 3  | 2.2  | 1.9        | 15    | 20    | 20    | T66A         | 1  | 2.6  | 0.5        | 0   | 60  | 15  |
| I50V   | 3  | 2.2  | 1.3        | 0     | 20    | 30    | Q148N        | 1  | 2.6  | 0.2        | 0   | 15  | 10  |
| I54L   | 3  | 2.2  | 2.6        | 15    | 20    | 20    |              |    |      |            |     |     |     |
| G73T   | 3  | 2.2  | 1.9        | 10    | 0     | 5     |              |    |      |            |     |     |     |
| K20T   | 2  | 1.4  | 0          | 5     | 0     | 0     |              |    |      |            |     |     |     |
| G73A   | 2  | 1.4  | 0.4        | 10    | 0     | 5     |              |    |      |            |     |     |     |
| L76V   | 2  | 1.4  | 3.5        | 0     | 20    | 30    |              |    |      |            |     |     |     |
| Q58E   | 2  | 1.4  | 6.3        | 0     | 0     | 0     |              |    |      |            |     |     |     |
| N88S   | 2  | 1.4  | 1.5        | 60    | -5    | 0     |              |    |      |            |     |     |     |
| V82S   | 2  | 1.4  | 0.9        | 30    | 0     | 30    |              |    |      |            |     |     |     |
| T74P   | 2  | 1.4  | 1.8        | 10    | 5     | 5     |              |    |      |            |     |     |     |
| I54S   | 1  | 0.7  | 0.5        | 15    | 0     | 15    |              |    |      |            |     |     |     |
| L24I   | 1  | 0.7  | 5.2        | 10    | 0     | 10    |              |    |      |            |     |     |     |
| I50L   | 1  | 0.7  | 0          | 60    | -10   | -10   |              |    |      |            |     |     |     |
| I54T   | 1  | 0.7  | 0.6        | 15    | 0     | 15    |              |    |      |            |     |     |     |
| G48M   | 1  | 0.7  | 0.4        | 30    | 0     | 10    |              |    |      |            |     |     |     |
| I47A   | 1  | 0.7  | 0.5        | 0     | 10    | 60    |              |    |      |            |     |     |     |
| V82M   | 1  | 0.7  | 0.4        | 10    | 0     | 25    |              |    |      |            |     |     |     |
| I54A   | 1  | 0.7  | 1          | 15    | 0     | 15    |              |    |      |            |     |     |     |
| L24M   | 1  | 0.7  | 0.1        | 5     | 0     | 5     |              |    |      |            |     |     |     |
| V82F   | 1  | 0.7  | 1.6        | 15    | 15    | 30    |              |    |      |            |     |     |     |
